# Supplementary material for: One-pot enzymatic synthesis of l-5-methyltetrahydrofolate from folic acid using enzyme cascades
Source: Royal Society of Chemistry journal article supplement (doi:10.1039/d4re00237g), 2024-01-01
Supplement: d4re00237g1.pdf [file d4re00237g1.pdf]

## Supplementary information

### One-pot enzymatic synthesis of L-5-methyltetrahydrofolate from folic acid using enzyme cascades

Table S1: Dihydrofolate reductase from 38 different sources

| Strain                               | Enzyme                            | GenBank accession NO. | Conversion <sup>a</sup> (%) |      |
|--------------------------------------|-----------------------------------|-----------------------|-----------------------------|------|
|                                      | <i>Ama</i> DHFR2855               | AMS41780              | 27.8                        |      |
| <i>Aminobacter aminovorans</i>       | <i>Ama</i> DHFR2417               | AMS41343              | 6.4                         |      |
|                                      | <i>Ama</i> DHFR0532               | AMS39471              | 6.3                         |      |
|                                      | <i>Ama</i> DHFR5858               | AMS44763              | 5.8                         |      |
|                                      | <i>Bsu</i> DHFR168                | NP_390064             | 7.7                         |      |
| <i>Bacillus subtilis</i>             | <i>Bsu</i> DHFR168                | NP_390064             | 7.7                         |      |
| <i>Xanthomonas campestris</i>        | <i>Xca</i> DHFR                   | AA550487              | 33.5                        |      |
| <i>Acinetobacter junii</i>           | <i>Aju</i> DHFR                   | APU49723              | 8.4                         |      |
| <i>Streptococcus mutans</i>          | <i>Smu</i> DHFR                   | AAN58651              | 7.9                         |      |
| <i>Brevibacterium casei</i>          | <i>Bca</i> DHFR                   | QPS35038              | 7.9                         |      |
| <i>Citrobacter amalonaticus</i>      | <i>Cam</i> DHFR                   | AKE57683              | 19.5                        |      |
| <i>Cronobacter sakazakii</i>         | <i>Csa</i> DHFR                   | ABU78511              | 9.9                         |      |
| <i>Lactobacillus brevis</i>          | <i>Lbr</i> DHFR0785               | ABJ63928              | 16.7                        |      |
|                                      | <i>Lbr</i> DHFR1497               | ABJ64593              | 16.3                        |      |
| Bacteria                             | <i>Streptococcus thermophiles</i> | <i>Sth</i> DHFR       | ALX90712                    | 7.9  |
|                                      | <i>Bifidobacterium bifidum</i>    | <i>Bbi</i> DHFR       | ADO53627                    | 21.9 |
| <i>Lactiplantibacillus plantarum</i> | <i>Lpl</i> DHFR                   | CCC79138              | 7.9                         |      |
|                                      | <i>Eco</i> DHFR                   | NP_414590             | 37.6                        |      |
| <i>Escherichia coli</i>              | <i>Eco</i> DHMPR                  | NP_416123             | 2.4                         |      |
|                                      | <i>Eco</i> DHFR-ANLYF             | 2D0K_A                | 13.1                        |      |
|                                      | <i>Las</i> DHFR                   | ABD99519              | 44.6                        |      |
| <i>Ligilactobacillus salivarius</i>  | <i>Las</i> DHFR                   | ABD99519              | 44.6                        |      |
| <i>Kosakonia cowanii</i>             | <i>Kco</i> DHFR                   | APZ03939              | 23.3                        |      |
| <i>Bacillus halodurans</i>           | <i>Bha</i> DHFR                   | BAB07169.1            | 37.8                        |      |
| <i>Alkaliphilus transvaalensis</i>   | <i>Trans</i> DHFR                 | WP_026477829.1        | 12.0                        |      |
| <i>Oceanobacillus iheyensis</i>      | <i>Oih</i> DHFR                   | BAC13695.1            | 9.4                         |      |
| <i>Bifidobacterium infantis</i>      | <i>Bin</i> DHFR                   | ACJ53202              | 4.8                         |      |
| <i>Bifidobacterium longum</i>        | <i>Blo</i> DHFR                   | ADH01092              | 53.7                        |      |

|                  |                                     |                      |              |      |
|------------------|-------------------------------------|----------------------|--------------|------|
|                  | <i>Bifidobacterium breve</i>        | <i>Bbr</i> DHFR      | BAR00601     | 13.7 |
|                  | <i>Bifidobacterium animalis</i>     | <i>Ban</i> DHFR      | AFI62698     | 4.9  |
|                  | <i>Lactocaseibacillus rhamnosus</i> | <i>Lrh</i> DHFR      | CAR87293     | 76.1 |
|                  | <i>Lactobacillus helveticus</i>     | <i>Lhe</i> DHFR      | ABX27049     | 4.2  |
|                  | <i>Lactobacillus bulgaricus</i>     | <i>Lbu</i> DHFR      | CAI97615     | 92.0 |
|                  | <i>Lactobacillus acidophilus</i>    | <i>Lac</i> DHFR      | AAV42759     | 13.1 |
| Fungi            | <i>Aspergillus oryzae</i>           | <i>Aor</i> DHFR      | XP_001826385 | 9.9  |
|                  | <i>Kluyveromyces lactis</i>         | <i>Kla</i> DHFR      | XP_453395    | 19.5 |
| Yeasts           | <i>Saccharomyces cerevisiae</i>     | <i>Sce</i> DHFR      | NP_014879    | 7.9  |
|                  | <i>Pichia pastoris</i>              | <i>Ppa</i> DHFR      | XP_002490391 | 37.8 |
| Malaria parasite | <i>Plasmodium falciparum</i>        | <i>Pf</i> DHFR-C59R  | AAA96491.1   | 2.6  |
| Human being      | <i>Homo sapiens</i>                 | <i>h</i> DHFR-35K64F | 3GHV_A       | 51.0 |

<sup>a</sup>: The cell extract was used for catalyzing the reduction reaction of folic acid (FA) to tetrahydrofolate. Reaction mixture: 2.3 mM FA, 1.0 g/L DTT, 50  $\mu$ M NADP<sup>+</sup>, 3.0%(v/v) isopropanol, 0.4 M HEPES buffer (pH=7.5) and cell extract of DHFR and *Lb*ADH. The mixtures were incubated at 37°C for 10 h with a magnetic stirrer.

Table S2: DmdAs from 9 different sources

| Strain                                     | Enzyme          | GenBank accession No. |
|--------------------------------------------|-----------------|-----------------------|
| <i>Algicella marina</i>                    | <i>Ama</i> DmdA | WP_161862203.1        |
| <i>Candidatus Pelagibacter ubique</i>      | <i>Pub</i> DmdA | WP_006997663.1        |
| <i>Candidatus Puniceispirillum marinum</i> | <i>Pma</i> DmdA | WP_013044947.1        |
| <i>Leisingera methylohalidivorans</i>      | <i>Lme</i> DmdA | WP_024090329.1        |
| <i>Ruegeria conchae</i>                    | <i>Rco</i> DmdA | WP_260026001.1        |
| <i>Sulfitobacter mediterraneus</i>         | <i>Sme</i> DmdA | WP_203211332.1        |
| <i>Thalassococcus sp. S3</i>               | <i>Tha</i> DmdA | WP_130406460.1        |
| <i>Roseibacterium elongatum</i>            | <i>Rel</i> DmdA | WP_025312765.1        |
| <i>Roseovarius indicus</i>                 | <i>Rin</i> DmdA | WP_057818642.1        |

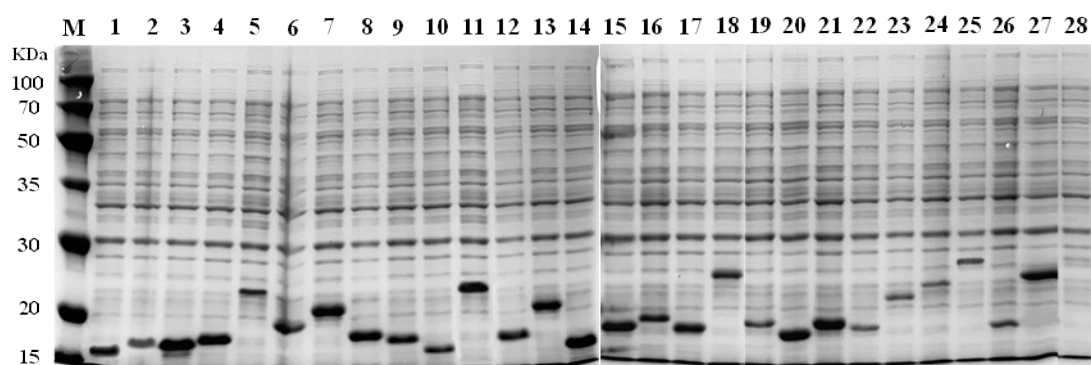

Fig S1 SDS-PAGE profile of partial recombinant DHFRs. DHFRs were produced by *E. coli* BL21(DE3) with the expression vector pET28a. The cell extracts of recombinant DHFRs were used for SDS-PAGE analysis. Lane M: Marker; Lane 1: *Trans*DHFR; Lane 2: *Oih*DHFR; Lane 3: *Eco*DHFR-ANLYF; Lane 4: *Bha*DHFR; Lane 5: *Pf*DHFR; Lane 6: *h*DHFR-35K64F; Lane 7: *Ppa*DHFR; Lane 8: *Lpj*DHFR; Lane 9: *Las*DHFR; Lane 10: *Kco*DHFR; Lane 11: *Eco*DHMPR; Lane 12: *Smu*DHFR; Lane 13: *Sce*DHFR; Lane 14: *Eco*DHFR; Lane 15: *Aju*DHFR; Lane 16: *Bsu*DHFR; Lane 17: *Xca*DHFR; Lane 18: *Bbi*DHFR; Lane 19: *Lbr*DHFR1497; Lane 20: *Lbr*DHFR0785; Lane 21: *Ama*DHFR2417; Lane 22: *Ama*DHFR2855; Lane 23: *Ama*DHFR5858; Lane 24: *Ama*DHFR0532; Lane 25: *Sth*DHFR; Lane 26: *Kla*DHFR; Lane 27: *Kco*DHFR; Lane 28: CK

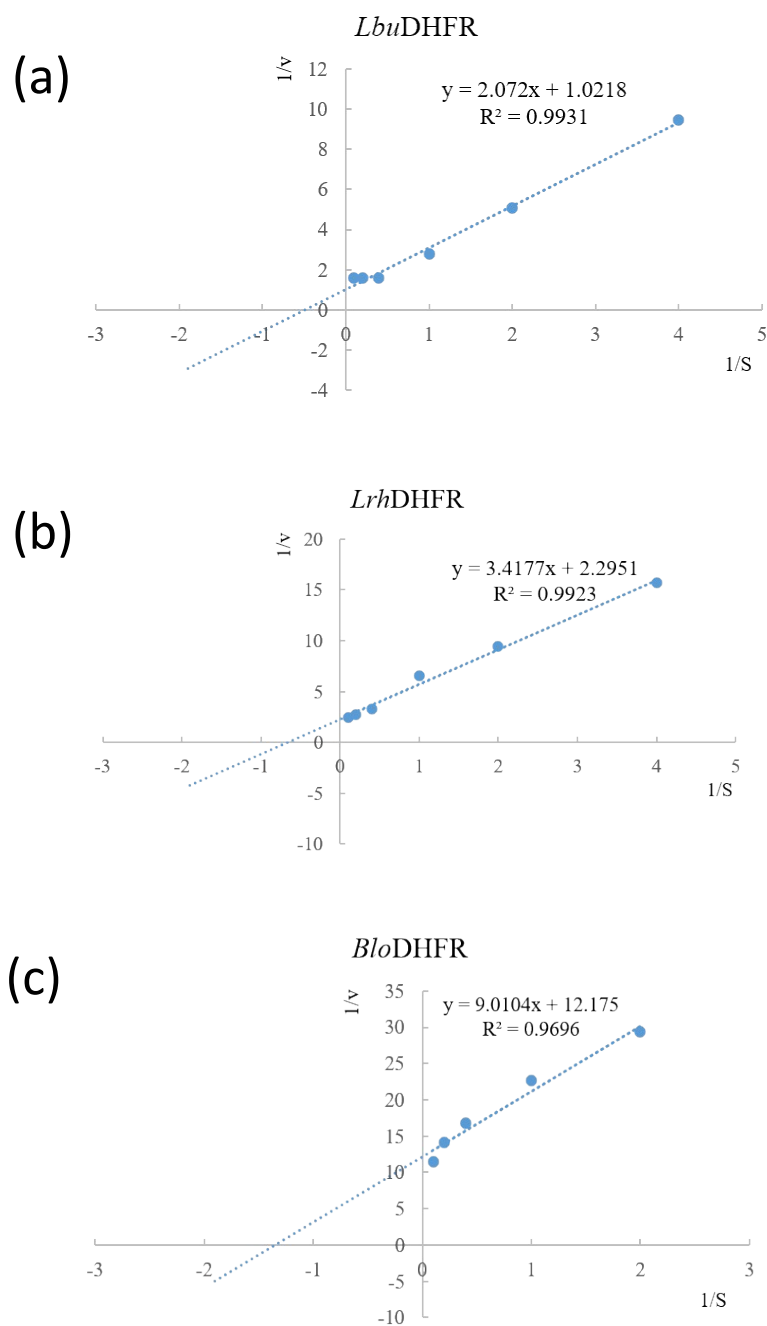

Fig S2 Double reciprocal plots of purified DHFRs based on the data of kinetic parameter assay. (a) *Lbu*DHFR from *Lactobacillus bulgaricus*. (b) *Lrh*DHFR from *Lactocaseibacillus rhamnosus*. (c) *Blo*DHFR from *Bifidobacterium longum*. Reaction mixture for kinetic parameter assay: 0.25 mM-20.0 mM of FA, 20 mM NADPH, 1.0 g/L DTT, 0.4 M HEPES buffer (pH=7.5), and 0.5 mg/mL purified DHFR. The mixtures were incubated at 37°C, 800 rpm for 5 min in a thermomixer. The concentration of FA and THF was determined by HPLC method using an Agilent Technologies 1260 Infinity II LC system with a 1260 DAD WR Detector (USA). HPLC conditions: column, InertSustain® C-18 column (4.6×250 mm) (GL Sciences Inc., Shanghai, China); mobile phase, 50 mM potassium phosphate buffer (pH6.3) : methanol = 92:8 (v/v); flow rate, 1.0 ml/min; and temperature, 40°C; injection volume, 10 µL; absorbance wavelength was set at 290 nm. Each

experiment was carried out in triple.

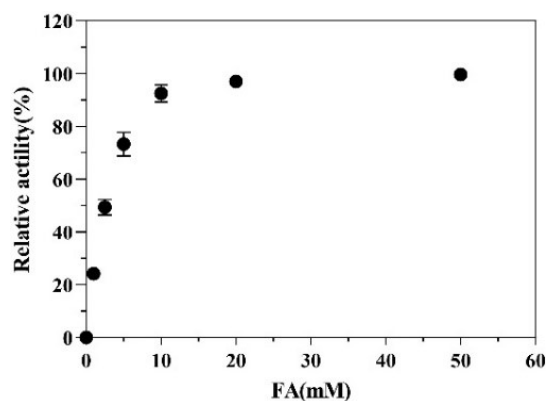

Fig S3 Effect of different adding concentration FA on the reduction activity of *LbuDHFR*. The mixtures for enzyme activity assay: 0-50 mM FA, 0.5 mg/mL purified *LbuDHFR*, 0.5 mg/mL purified *LbADH*, 50  $\mu$ M NADP<sup>+</sup>, 1.0 g/L DTT, 3.0%(v/v) isopropanol, and 0.4 M HEPES buffer. The mixtures were incubated at 40°C, 800 rpm for 10 min in a thermomixer. The maximum value of enzyme activity is defined as 100% of relative activity.

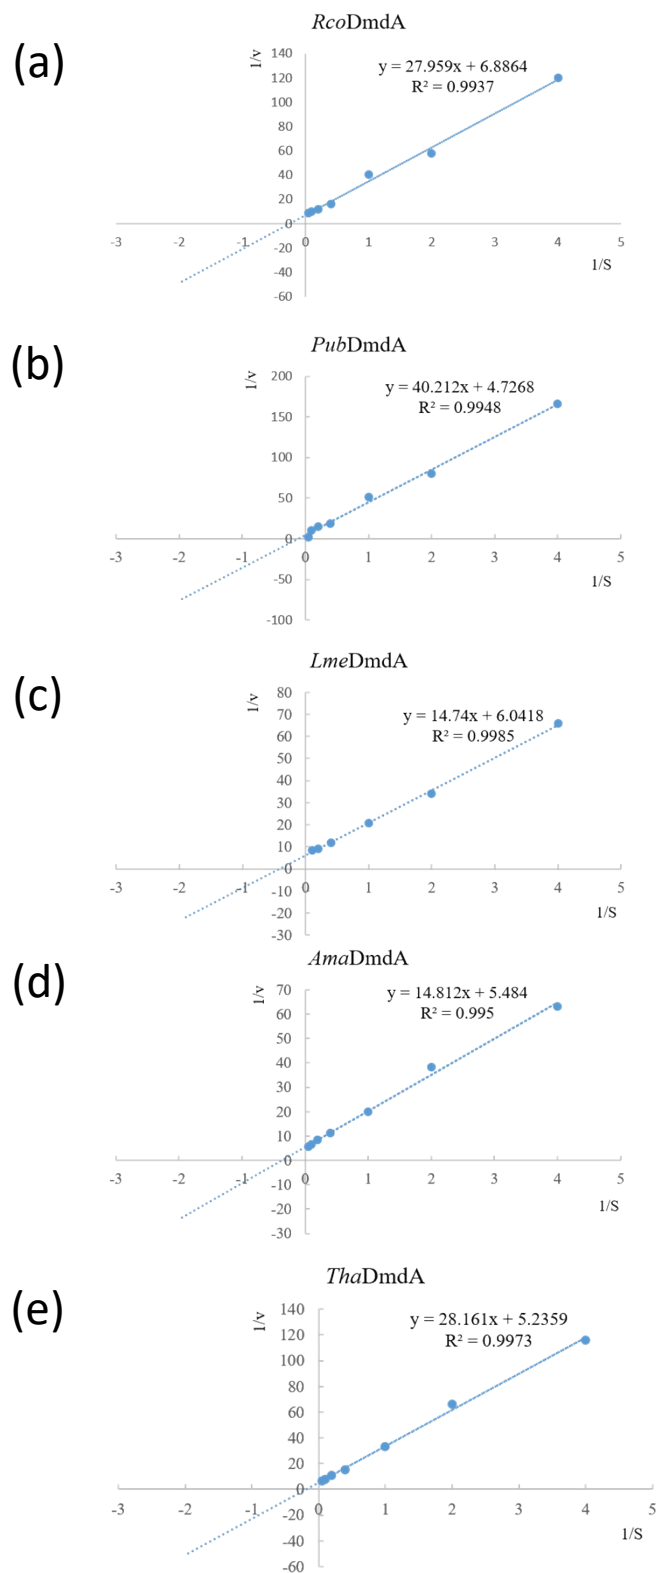

Fig S4 Double reciprocal plots of purified DmdAs based on the data of kinetic parameter assay. (a) *RcoDmdA* from *Ruegeria conchae*. (b) *PubDmdA* from *Candidatus Pelagibacter ubique*. (c) *LmeDmdA* from *Leisingera methylohalidivorans*. (d) *AmaDmdA* from *Algicella marina*. (e) *ThaDmdA* from *Thalassococcus sp.* S3. Reaction mixture contained 0.25-20.0 mM of THF, 200.0 mM of MSDS, 1.0 g/L of DTT, 0.4 M of HEPES buffer (pH=7.5), and 0.7 mg/mL purified

DmdAs. The mixtures were incubated at 37°C, 800 rpm for 5 min in a thermostatically shaken metal bath. The concentration of FA, THF, and *L*-5-MTHF was determined by HPLC method using an Agilent Technologies 1260 Infinity II LC system with a 1260 DAD WR Detector (USA). HPLC conditions: column, InertSustain® C-18 column (4.6×250 mm) (GL Sciences Inc., Shanghai, China); mobile phase, 50 mM potassium phosphate buffer (pH6.3) : methanol = 92:8 (v/v); flow rate, 1.0 ml/min; and temperature, 40°C; injection volume, 10 µL; absorbance wavelength was set at 290 nm. Each experiment was carried out in triple.

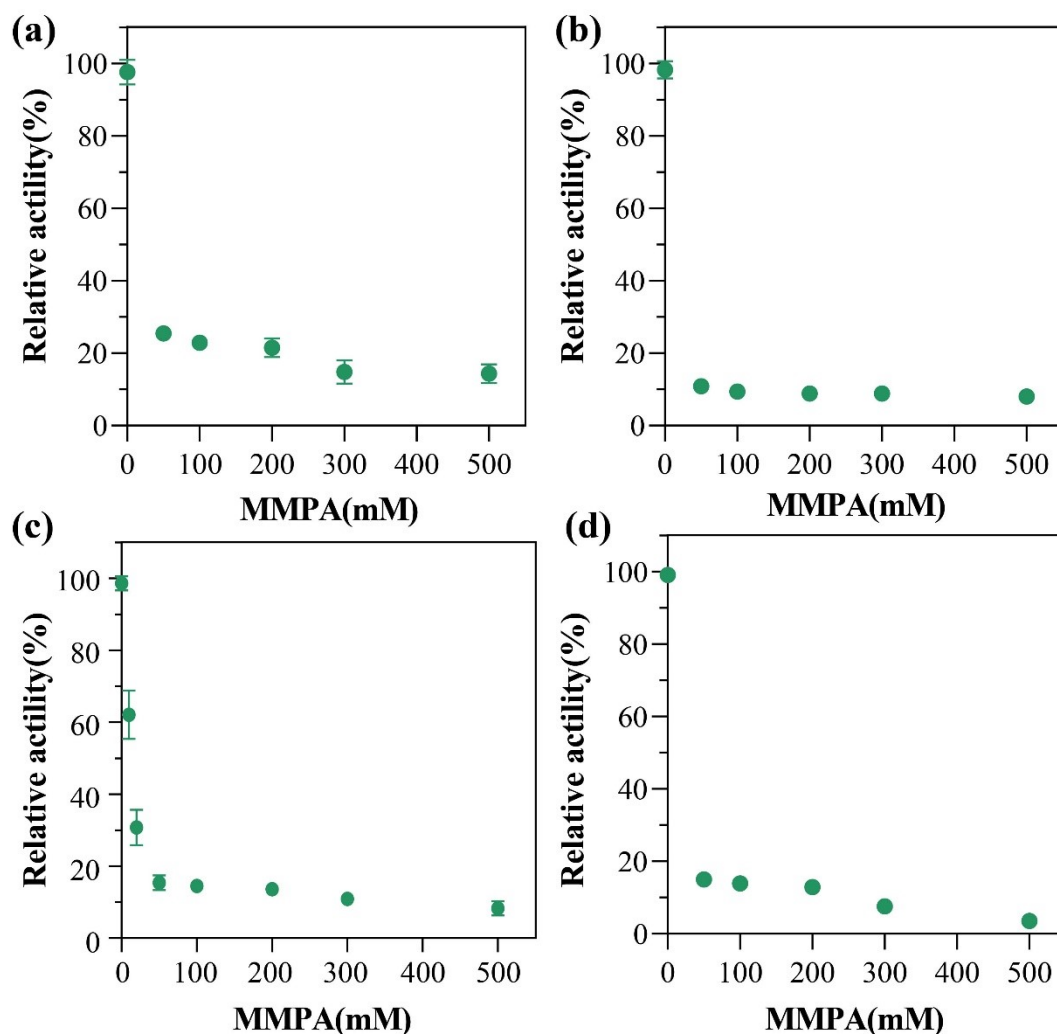

Fig S5 : Effect of the by-product MMPA on the transmethylation activity of *AmaDmdA* (a), *LmeDmdA* (b), *PubDmdA* (c) and *ThaDmdA* (d). 0-500 mM of by-product MMPA was added to the reaction mixture for evaluating the inhibitory effect on methylation of THF. Reaction mixture contained different concentration of MMPA, 2.3 mM THF, 10 mM MSDS, 1.0 g/L DTT, 0.6 mg/mL of purified DmdAs, and 0.4 M HEPES buffer (pH=7.5). The mixtures were incubated at 800 rpm for 15 min in a thermomixer. The enzyme activity without the addition of MMPA was defined as 100% of relative activity.

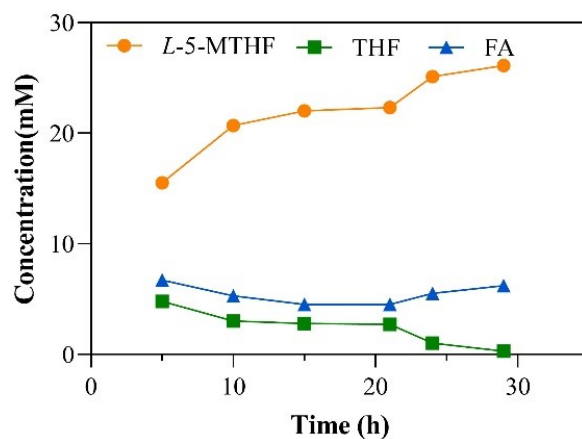

Fig S6 : Monitoring the process of three-enzyme cascade reaction with the adding of 34 mM of FA. Reaction mixture: 34 mM FA, 150 mM MSDS, 50  $\mu$ M NADP<sup>+</sup>, 1.0 g/L DTT, 3.0 % (v/v) isopropyl alcohol, cell extract equivalent to 60 of OD<sub>600</sub>. The ratio of cell density was 1:1:4 (*Lb*ADH: *Lbu*DHFR: *Rco*DmdA). The pH was controlled at pH7.5 by an automatic titrator. The mixtures were incubated at 35°C for 29 h in a thermostatic water bath with a magnetic stirrer.
